# Supplementary material for: Neutrophils dominate the immune cell composition in non-small cell lung cancer
Source: PubMed Central journal article supplement (PMC5296654; doi:10.1038/ncomms14381), 2017-02-01
Supplement: ncomms14381-s1.pdf [file ncomms14381-s1.pdf]

**Supplementary Table 1: Patient Demographics**

| <b>Factor</b>     | <b>All<br/>NSCLC</b> | <b>Lung<br/>ADCA</b> | <b>Lung<br/>SCCA</b> | <b>Other</b> |
|-------------------|----------------------|----------------------|----------------------|--------------|
| <i>N</i>          | 73                   | 54<br>(74%)          | 15<br>(21%)          | 4<br>(5%)    |
| <b>Age</b>        | 67.3                 | 66.5                 | 69.1                 | 71.8         |
| <b>% Male</b>     | 49                   | 43                   | 67                   | 75           |
| <b>Race</b>       |                      |                      |                      |              |
| <b>White</b>      | 64 (88)              | 47 (87)              | 13 (86)              | 4 (100)      |
| <b>Asian</b>      | 6 (8)                | 5 (9)                | 1(7)                 | 0            |
| <b>Other</b>      | 3 (4)                | 2 (4)                | 1 (7)                | 0            |
| <b>Smoking</b>    |                      |                      |                      |              |
| <b>Current</b>    | 20 (27)              | 15 (28)              | 5 (33)               | 0            |
| <b>Former</b>     | 45 (62)              | 33 (61)              | 10 (67)              | 2 (50)       |
| <b>Never</b>      | 8 (11)               | 6 (11)               | 0                    | 2 (50)       |
| <b>Pack Years</b> | 29.9                 | 27.9                 | 41.1                 | 13.8         |
| <b>Size (cm)</b>  | 2.78                 | 2.69                 | 3.06                 | 2.93         |
| <b>Stage</b>      |                      |                      |                      |              |
| <b>1A</b>         | 25 (34)              | 19 (35)              | 6 (40)               | 0            |
| <b>1B</b>         | 23 (32)              | 18 (33)              | 3 (20)               | 2 (50)       |
| <b>2A</b>         | 10 (14)              | 7 (13)               | 2 (13)               | 1 (25)       |
| <b>2B</b>         | 4 (5)                | 2 (4)                | 1 (7)                | 1 (25)       |
| <b>3A</b>         | 10 (14)              | 7 (13)               | 3 (20)               | 0            |
| <b>4</b>          | 1 (1)                | 1 (2)                | 0                    | 0            |

**Supplementary Table 2: Immune Cell Markers**

| <b>Antigen</b>                      | <b>Label</b>  | <b>Clone</b> | <b>ul/test</b> | <b>Company</b> | <b>Catalog #</b> |
|-------------------------------------|---------------|--------------|----------------|----------------|------------------|
| <b>CD14</b>                         | BUV395        | MφP9         | 5              | BD             | 563561           |
| <b>CD16</b>                         | BV605         | 3G8          | 5              | BD             | 563172           |
| <b>CD3</b>                          | PE-CF594      | UCHT1        | 5              | BD             | 562280           |
| <b>CD4</b>                          | BUV395        | SK3          | 5              | BD             | 563550           |
| <b>IL17A</b>                        | PE            | N49-653      | 20             | BD             | 560486           |
| <b>IFN<math>\gamma</math></b>       | FITC          | B27          | 1              | BD             | 554700           |
| <b>CD127</b>                        | BV786         | HIL-7R-M21   | 5              | BD             | 563324           |
| <b>CD19</b>                         | BUV737        | SJ25C1       | 5              | BD             | 564303           |
| <b>CD15</b>                         | BV786         | HI98         | 5              | BD             | 563838           |
| <b>HLA-DR</b>                       | BUV661        | G46-6        | 5              | BD             | 565073           |
| <b>CD4</b>                          | BV605         | OKT4         | 5              | Biologend      | 317438           |
| <b>CD45</b>                         | AlexaFluor700 | HI30         | 1              | Biologend      | 304024           |
| <b>CD66b</b>                        | PE            | G10F5        | 5              | Biologend      | 305106           |
| <b>CD68</b>                         | APC           | Y1/82A       | 5              | Biologend      | 333810           |
| <b>CD274 (PDL1)</b>                 | PE-Cy7        | 29E.2A3      | 5              | Biologend      | 329718           |
| <b>CD33</b>                         | BV421         | WM53         | 5              | Biologend      | 303416           |
| <b>CD4</b>                          | BV605         | RPA-T4       | 5              | Biologend      | 317438           |
| <b>CD25</b>                         | BV421         | BC96         | 5              | Biologend      | 302630           |
| <b>TCR<math>\gamma\delta</math></b> | APC           | B1.1         | 5              | Biologend      | 331212           |
| <b>CD8</b>                          | BV510         | RPA-T8       | 5              | Biologend      | 301048           |
| <b>CD8</b>                          | FITC          | RPA-T8       | 2              | Biologend      | 301006           |
| <b>CD56</b>                         | PE            | HCD56        | 5              | Biologend      | 318306           |
| <b>CD20</b>                         | BV421         | 2H7          | 5              | Biologend      | 302330           |
| <b>NKG2D</b>                        | PE-Cy7        | 1D11         | 5              | Biologend      | 320812           |
| <b>CCR7</b>                         | PE-Cy7        | G043H7       | 5              | Biologend      | 353226           |
| <b>CD45RA</b>                       | APC           | HI100        | 5              | Biologend      | 304112           |
| <b>CD69</b>                         | BV605         | FN50         | 5              | Biologend      | 310938           |
| <b>PD1</b>                          | BV421         | EH12.2H7     | 5              | Biologend      | 329920           |
| <b>CD326 (EpCAM)</b>                | FITC          | 9C4          | 5              | Biologend      | 324204           |
| <b>CD11b</b>                        | BV650         | ICRF44       | 5              | Biologend      | 301336           |
| <b>IL22</b>                         | PE-Cy7        | 22URTI       | 5              | eBioscience    | 25-7229-42       |
| <b>CD19</b>                         | PerCPCy5.5    | HIB19        | 5              | eBioscience    | 45-0199-42       |
| <b>FVD</b>                          | APC-ef780     | -            | 0.2            | eBioscience    | 65-0865-14       |
| <b>TIM3</b>                         | PE            | 344823       | 5              | R&D Systems    | FAB2365P         |

**Supplementary Table 3: Unpaired t-tests for lung vs. tumor and L-ADCA vs. L-SCCA**

| <b>% of</b> | <b>Cell population</b> | <b>Lung vs. Tumor</b> | <b>ADCA vs SCCA</b> |
|-------------|------------------------|-----------------------|---------------------|
| % live      | CD45                   | 0.82241               | 0.07023             |
| % live      | EpCAM                  | 0.01065               | 0.92376             |
| % CD45      | CD3                    | 0.00000               | 0.99500             |
| % CD45      | CD4                    | 0.00001               | 0.24897             |
| % CD45      | CD8                    | 0.00016               | 0.10618             |
| % CD45      | Tgd                    | 0.65118               | 0.92503             |
| % CD45      | NK                     | 0.00025               | 0.85798             |
| % CD45      | NKT                    | 0.00991               | 0.34630             |
| % CD45      | Bcells                 | 0.00000               | 0.56647             |
| % CD45      | Mac                    | 0.00000               | 0.01975             |
| % CD45      | Mono                   | 0.68578               | 0.71318             |
| % CD45      | CD14-CD33+             | 0.87744               | 0.27477             |
| % CD45      | PMN                    | 0.37325               | 0.03282             |
| % gdT       | Tgd IL17A              | 0.00407               | 0.85899             |
| % gdT       | Tgd IFNg               | 0.85221               | 0.85580             |
| % gdT       | Tgd IL22               | 0.00849               | 0.13732             |
| % CD4       | CD4+ IL17A             | 0.05864               | 0.03528             |
| % CD4       | CD4+IL22               | 0.42312               | 0.31931             |
| % CD4       | CD4+IL17A+IL22+        | 0.01718               | 0.31057             |
| % CD4       | CD4+IFNg               | 0.00035               | 0.04707             |
| % CD4       | Treg                   | <0.00001              | 0.00006             |
| % CD4       | CD4EM                  | 0.24833               | 0.20101             |
| % CD4       | CD4CM                  | 0.16730               | 0.73166             |
| % CD4       | CD4naive               | 0.00543               | 0.41214             |
| % CD4       | CD4EMRA                | 0.00379               | 0.47215             |
| % CD4       | CD4+ CD69              | 0.60107               | 0.07469             |
| % CD4       | CD4+ PD1               | 0.00000               | 0.00253             |
| % CD4       | CD4+ TIM3              | 0.00016               | 0.11155             |
| % CD4       | CD4+ PD1-TIM3-         | 0.00000               | 0.02700             |
| % CD4       | CD4+ PD1+TIM3-         | 0.00012               | 0.01946             |
| % CD4       | CD4+ PD1+TIM3+         | 0.00000               | 0.44402             |
| % CD4       | CD4+ PD1-TIM3+         | 0.81601               | 0.25677             |
| % CD8       | CD8+IFNg               | 0.33900               | 0.98888             |
| % CD8       | CD8EM                  | 0.00000               | 0.01226             |
| % CD8       | CD8CM                  | 0.07400               | 0.86100             |
| % CD8       | CD8naive               | 0.21348               | 0.70970             |
| % CD8       | CD8EMRA                | 0.00000               | 0.00643             |
| % CD8       | CD8+ CD69              | 0.18627               | 0.12426             |
| % CD8       | CD8 PD1                | 0.00000               | 0.01085             |
| % CD8       | CD8+ TIM3              | 0.00000               | 0.66851             |
| % CD8       | CD8+ PD1-TIM3-         | 0.00000               | 0.01559             |
| % CD8       | CD8+ PD1+TIM3-         | 0.00377               | 0.01881             |
| % CD8       | CD8+ PD1+TIM3+         | 0.00000               | 0.47425             |
| % CD8       | CD8+ PD1-TIM3+         | 0.32673               | 0.58201             |
| MFI         | CD4+ CD69              | 0.63653               | 0.24495             |
| MFI         | CD4+ PD1               | 0.00006               | 0.00952             |
| MFI         | CD4+TIM3               | 0.00184               | 0.42447             |
| MFI         | CD8+CD69               | 0.00030               | 0.19333             |
| MFI         | CD8+PD1                | 0.00000               | 0.02811             |
| MFI         | CD8+ TIM3              | 0.00000               | 0.90053             |
| MFI         | NKT NKG2D              | 0.00047               | 0.72978             |
| MFI         | NK NKG2D               | 0.44371               | 0.39137             |

|            |             |         |         |
|------------|-------------|---------|---------|
| <b>MFI</b> | Tgd NKG2D   | 0.00899 | 0.27486 |
| <b>MFI</b> | total PD-L1 | 0.02706 | 0.16392 |
| <b>MFI</b> | PMN PD-L1   | 0.00346 | 0.04823 |
| <b>MFI</b> | Mac PD-L1   | 0.13175 | 0.67825 |
| <b>MFI</b> | Mono PD-L1  | 0.01229 | 0.01020 |
| <b>MFI</b> | CD45- PD-L1 | 0.04190 | 0.09140 |
| <b>MFI</b> | EpCAM PD-L1 | 0.00202 | 0.01953 |

**Supplementary Table 4: Unpaired t-tests for lung vs. tumor and L-ADCA vs. L-SCCA (all data expressed as % of CD45)**

| % of   | Cell population | Lung vs Tumor | ADCA vs SCCA |
|--------|-----------------|---------------|--------------|
| % CD45 | CD3             | 0.00000       | 0.99500      |
| % CD45 | CD4             | 0.00001       | 0.24897      |
| % CD45 | CD8             | 0.00016       | 0.10618      |
| % CD45 | Tgd             | 0.65118       | 0.92503      |
| % CD45 | NK              | 0.00025       | 0.85798      |
| % CD45 | NKT             | 0.00991       | 0.34630      |
| % CD45 | Bcells          | 0.00000       | 0.56647      |
| % CD45 | Mac             | 0.00000       | 0.01975      |
| % CD45 | Mono            | 0.68578       | 0.71318      |
| % CD45 | CD14-CD33+      | 0.87744       | 0.27477      |
| % CD45 | PMN             | 0.37325       | 0.03282      |
| % CD45 | Tgd IL17        | 0.00007       | 0.63034      |
| % CD45 | Tgd IFNg        | 0.00018       | 0.39253      |
| % CD45 | Tgd IL22        | 0.00048       | 0.37731      |
| % CD45 | CD4+ IL17       | 0.00002       | 0.06999      |
| % CD45 | CD4+IL22        | 0.00019       | 0.15406      |
| % CD45 | CD4+IL17+IL22+  | 0.00025       | 0.16325      |
| % CD45 | CD4+IFNg        | 0.20615       | 0.05323      |
| % CD45 | Treg            | <0.00001      | 0.14309      |
| % CD45 | CD4EM           | 0.00001       | 0.64308      |
| % CD45 | CD4CM           | 0.03315       | 0.67581      |
| % CD45 | CD4naive        | 0.47011       | 0.44593      |
| % CD45 | CD4EMRA         | 0.57728       | 0.59177      |
| % CD45 | CD4+ CD69       | 0.03388       | 0.12500      |
| % CD45 | CD4+ PD1        | 0.00000       | 0.22081      |
| % CD45 | CD4+ TIM3       | 0.00004       | 0.18678      |
| % CD45 | CD4+ PD1-TIM3-  | 0.42348       | 0.14813      |
| % CD45 | CD4+ PD1+TIM3-  | 0.00000       | 0.54021      |
| % CD45 | CD4+ PD1+TIM3+  | 0.00000       | 0.70350      |
| % CD45 | CD4+ PD1-TIM3+  | 0.09197       | 0.34784      |
| % CD45 | CD8+IFNg        | 0.00510       | 0.00699      |
| % CD45 | CD8EM           | 0.00000       | 0.00737      |
| % CD45 | CD8CM           | 0.02628       | 0.40778      |
| % CD45 | CD8naive        | >0.99999      | 0.21574      |
| % CD45 | CD8EMRA         | 0.13812       | 0.37237      |
| % CD45 | CD8+ CD69       | 0.00503       | 0.58720      |
| % CD45 | CD8 PD1         | 0.00000       | 0.00388      |
| % CD45 | CD8+ TIM3       | 0.00001       | 0.36818      |
| % CD45 | CD8+ PD1-TIM3-  | 0.48928       | 0.97415      |
| % CD45 | CD8+ PD1+TIM3-  | 0.00000       | 0.00079      |
| % CD45 | CD8+ PD1+TIM3+  | 0.00000       | 0.18855      |

|               |                |         |         |
|---------------|----------------|---------|---------|
| <b>% CD45</b> | CD8+ PD1-TIM3+ | 0.01149 | 0.94173 |
|---------------|----------------|---------|---------|

**Supplementary Table 5: Unpaired t-tests for lung vs. tumor and L-ADCA vs. L-SCCA (all data expressed as % live cells)**

| <b>% live</b> | <b>Cell population</b> | <b>Lung vs. Tumor</b> | <b>ADCA vs SCCA</b> |
|---------------|------------------------|-----------------------|---------------------|
| % live        | CD45                   | 0.82241               | 0.07023             |
| % live        | EpCAM                  | 0.01065               | 0.92376             |
| % live        | CD3                    | 0.00001               | 0.6991              |
| % live        | CD4                    | 0.00005               | 0.50106             |
| % live        | CD8                    | 0.00036               | 0.08976             |
| % live        | Tgd                    | 0.77885               | 0.78054             |
| % live        | NK                     | 0.00016               | 0.64302             |
| % live        | NKT                    | 0.01015               | 0.17846             |
| % live        | Bcells                 | 0.00000               | 0.40496             |
| % live        | Mac                    | 0.00000               | 0.04052             |
| % live        | Mono                   | 0.51530               | 0.95403             |
| % live        | CD14-CD33+             | 0.84399               | 0.28161             |
| % live        | PMN                    | 0.43756               | 0.00984             |
| % live        | Tgd IL17               | 0.00008               | 0.74648             |
| % live        | Tgd IFNg               | 0.00046               | 0.60967             |
| % live        | Tgd IL22               | 0.00040               | 0.31897             |
| % live        | CD4+ IL17              | 0.00002               | 0.09807             |
| % live        | CD4+IL22               | 0.00022               | 0.18593             |
| % live        | CD4+IL17+IL22+         | 0.00067               | 0.19046             |
| % live        | CD4+IFNg               | 0.28961               | 0.10198             |
| % live        | Treg                   | 0.00000               | 0.0987              |
| % live        | CD4EM                  | 0.00010               | 0.77226             |
| % live        | CD4CM                  | 0.02255               | 0.66526             |
| % live        | CD4naive               | 0.54511               | 0.42745             |
| % live        | CD4EMRA                | 0.63671               | 0.61308             |
| % live        | CD4+ CD69              | 0.05484               | 0.17963             |
| % live        | CD4+ PD1               | 0.00000               | 0.20101             |
| % live        | CD4+ TIM3              | 0.00010               | 0.1636              |
| % live        | CD4+ PD1-TIM3-         | 0.57364               | 0.16856             |
| % live        | CD4+ PD1+TIM3-         | 0.00000               | 0.48527             |
| % live        | CD4+ PD1+TIM3+         | 0.00000               | 0.56738             |
| % live        | CD4+ PD1-TIM3+         | 0.06542               | 0.38413             |
| % live        | CD8+IFNg               | 0.01215               | 0.01252             |
| % live        | CD8EM                  | 0.00000               | 0.00311             |
| % live        | CD8CM                  | 0.02532               | 0.3698              |

|               |                |           |         |
|---------------|----------------|-----------|---------|
| <b>% live</b> | CD8naive       | >0.999999 | 0.10423 |
| <b>% live</b> | CD8EMRA        | 0.10679   | 0.70531 |
| <b>% live</b> | CD8+ CD69      | 0.00701   | 0.61274 |
| <b>% live</b> | CD8 PD1        | 0.00000   | 0.00753 |
| <b>% live</b> | CD8+ TIM3      | 0.00001   | 0.43539 |
| <b>% live</b> | CD8+ PD1-TIM3- | 0.34422   | 0.87999 |
| <b>% live</b> | CD8+ PD1+TIM3- | 0.00002   | 0.00285 |
| <b>% live</b> | CD8+ PD1+TIM3+ | 0.00000   | 0.21704 |
| <b>% live</b> | CD8+ PD1-TIM3+ | 0.01421   | 0.9417  |

**Supplementary Table 6: Linear regression associating cell composition and MFI with control, tumor size, and pack years (PY) smoking**

| Population                                            | Control coefficients | Size coefficients  | PY coefficients      | Control p-value | Size p-value | PY p-value |
|-------------------------------------------------------|----------------------|--------------------|----------------------|-----------------|--------------|------------|
| CD45                                                  | 0.3312 ± 0.09231     | 1.759 ± 1.115      | 0.07386 ± 0.07148    | 0.0006          | 0.1192       | 0.3050     |
| CD3                                                   | 0.2014 ± 0.09119     | -1.737 ± 1.245     | 0.1884 ± 0.09356     | 0.0307          | 0.1675       | 0.0481     |
| CD4                                                   | 0.3197 ± 0.1043      | -1.223 ± 0.7578    | 0.04572 ± 0.05098    | 0.0031          | 0.1113       | 0.3729     |
| CD8                                                   | 0.1607 ± 0.07470     | -0.6643 ± 0.7019   | 0.09401 ± 0.04513    | 0.0350          | 0.3472       | 0.0410     |
| γδ T                                                  | 0.8634 ± 0.1752      | 0.03111 ± 0.07434  | 0.006777 ± 0.004743  | < 0.0001        | 0.6770       | 0.1576     |
| NK                                                    | 0.8407 ± 0.2065      | -0.2598 ± 0.1545   | 0.002702 ± 0.01249   | 0.0001          | 0.0973       | 0.8294     |
| NK-T                                                  | 1.524 ± 0.2342       | 0.05241 ± 0.1289   | 0.01434 ± 0.009610   | < 0.0001        | 0.6857       | 0.1404     |
| B                                                     | 0.003692 ± 0.02025   | -0.06123 ± 0.3436  | 0.01480 ± 0.02668    | 0.8559          | 0.8591       | 0.5811     |
| Macrophage                                            | 0.1795 ± 0.2236      | -1.050 ± 0.8958    | -0.09606 ± 0.05823   | 0.4249          | 0.2452       | 0.1039     |
| Monocyte                                              | 0.1753 ± 0.06969     | 0.9495 ± 0.4745    | -0.03354 ± 0.03239   | 0.0144          | 0.0498       | 0.3044     |
| CD14 <sup>+</sup> CD33 <sup>+</sup>                   | 0.3351 ± 0.1210      | -0.8341 ± 1.164    | -0.04670 ± 0.09277   | 0.0076          | 0.4767       | 0.6167     |
| Neutrophil                                            | 0.08579 ± 0.1291     | 3.626 ± 0.8827     | -0.001736 ± 0.06593  | 0.5086          | 0.0001       | 0.9791     |
| EpCAM                                                 | 0.1406 ± 0.1079      | -1.378 ± 0.8848    | 0.02942 ± 0.06869    | 0.2013          | 0.1271       | 0.6707     |
| γδ T-IL17                                             | -38.84 ± 84.80       | 0.01561 ± 0.3021   | -0.01855 ± 0.02365   | 0.6486          | 0.9589       | 0.4358     |
| γδ T-IFNγ                                             | 0.4196 ± 0.1279      | -1.886 ± 1.482     | 0.004953 ± 0.1179    | 0.0017          | 0.2081       | 0.9666     |
| γδ T-IL22                                             | 0.03459 ± 0.03067    | 0.7857 ± 0.3331    | 0.01791 ± 0.02777    | 0.2645          | 0.0221       | 0.5219     |
| CD8-IFNγ                                              | 0.1734 ± 0.1380      | 1.969 ± 2.918      | -0.1019 ± 0.1107     | 0.2148          | 0.5215       | 0.3616     |
| Th17                                                  | 0.2303 ± 0.09434     | 0.004461 ± 0.2326  | -0.009093 ± 0.01536  | 0.0174          | 0.9848       | 0.5560     |
| Th22                                                  | 0.3134 ± 0.1925      | -0.1063 ± 0.1017   | 0.003830 ± 0.008164  | 0.1093          | 0.3006       | 0.6410     |
| CD4 <sup>+</sup> IL17A <sup>+</sup> IL22 <sup>+</sup> | 0.2747 ± 0.06858     | -0.03911 ± 0.06193 | -4.025e-005 ± 0.0048 | 0.0002          | 0.5305       | 0.9934     |
| Th1                                                   | 0.6169 ± 0.1041      | -3.256 ± 1.454     | 0.05526 ± 0.09883    | < 0.0001        | 0.0286       | 0.5780     |
| Treg                                                  | 0.08373 ± 0.04710    | 1.305 ± 0.6229     | 0.08739 ± 0.04606    | 0.0802          | 0.0402       | 0.0623     |
| CD4EM                                                 | 0.8804 ± 0.1128      | 0.2945 ± 0.8164    | -0.02053 ± 0.06708   | < 0.0001        | 0.7201       | 0.7608     |
| CD4CM                                                 | 0.7811 ± 0.1126      | -0.2779 ± 0.5985   | -0.0009962 ± 0.0444  | < 0.0001        | 0.6443       | 0.9822     |
| CD4Naive                                              | 1.066 ± 0.1698       | -0.04392 ± 0.09992 | -0.006663 ± 0.00733  | < 0.0001        | 0.6620       | 0.3675     |
| CD4EMRA                                               | 1.007 ± 0.08827      | 0.7829 ± 0.7691    | 0.02836 ± 0.05752    | < 0.0001        | 0.3133       | 0.6240     |
| CD8EM                                                 | 0.4510 ± 0.1445      | 1.688 ± 1.240      | 0.1416 ± 0.08856     | 0.0029          | 0.1790       | 0.1156     |
| CD8CM                                                 | 1.461 ± 0.1185       | -0.4273 ± 0.3619   | -0.01774 ± 0.02651   | < 0.0001        | 0.2429       | 0.5061     |
| CD8Naive                                              | 1.040 ± 0.1042       | -0.1031 ± 0.09820  | -0.01404 ± 0.006890  | < 0.0001        | 0.2983       | 0.0464     |
| CD8EMRA                                               | 0.5094 ± 0.1572      | -1.268 ± 1.219     | -0.1385 ± 0.08629    | 0.0021          | 0.3026       | 0.1141     |
| CD8CD69                                               | 0.8705 ± 0.05154     | -0.3617 ± 2.258    | 0.02389 ± 0.1777     | < 0.0001        | 0.8733       | 0.8936     |
| CD8PD1                                                | 0.6092 ± 0.1076      | 0.4014 ± 1.653     | 0.2259 ± 0.1254      | < 0.0001        | 0.8091       | 0.0773     |
| CD8TIM3                                               | 0.06222 ± 0.03224    | 0.8838 ± 1.039     | 0.1116 ± 0.08032     | 0.0589          | 0.3988       | 0.1704     |
| CD4CD69                                               | 0.9283 ± 0.05027     | -3.066 ± 2.062     | -0.1545 ± 0.1621     | < 0.0001        | 0.1432       | 0.3450     |
| CD4PD1                                                | 0.5593 ± 0.09301     | 3.356 ± 1.639      | 0.2460 ± 0.1271      | < 0.0001        | 0.0457       | 0.0583     |
| CD4TIM3                                               | 0.2042 ± 0.04277     | 1.251 ± 0.6378     | -0.02327 ± 0.05126   | < 0.0001        | 0.0552       | 0.6517     |
| <b>MFI</b>                                            |                      |                    |                      |                 |              |            |
| NK-T NKG2D                                            | 1.105 ± 0.1120       | -6.791 ± 8.921     | -0.3963 ± 0.7181     | < 0.0001        | 0.4497       | 0.5832     |
| NK NKG2D                                              | 0.9211 ± 0.1064      | 2.864 ± 5.806      | -0.5888 ± 0.4585     | < 0.0001        | 0.6237       | 0.2044     |
| γδ T NKG2D                                            | 0.9805 ± 0.1651      | -12.03 ± 6.655     | -0.5203 ± 0.5428     | < 0.0001        | 0.0763       | 0.3421     |
| CD8CD69                                               | 0.8375 ± 0.08911     | -18.63 ± 24.99     | -1.500 ± 1.802       | < 0.0001        | 0.4593       | 0.4087     |
| CD8PD1                                                | 0.09831 ± 0.07068    | 42.81 ± 22.28      | 4.469 ± 1.666        | 0.1700          | 0.0598       | 0.0096     |
| CD8TIM3                                               | 0.1390 ± 0.04129     | 3.801 ± 7.113      | 1.304 ± 0.5296       | 0.0014          | 0.5952       | 0.0170     |
| CD4CD69                                               | 0.9715 ± 0.07771     | -9.670 ± 15.65     | -0.9069 ± 1.126      | < 0.0001        | 0.5393       | 0.4243     |
| CD4PD1                                                | 0.2020 ± 0.06215     | 95.53 ± 23.22      | 2.079 ± 2.049        | 0.0020          | 0.0001       | 0.3149     |
| CD4TIM3                                               | 0.1984 ± 0.04289     | 9.819 ± 4.906      | 0.6699 ± 0.3852      | < 0.0001        | 0.0504       | 0.0877     |
| PMN PDL1                                              | 0.3927 ± 0.07647     | -2.603 ± 9.524     | 0.03010 ± 0.8210     | < 0.0001        | 0.7856       | 0.9709     |
| Mac PDL1                                              | 0.6949 ± 0.1321      | -31.74 ± 48.54     | -0.1372 ± 4.016      | < 0.0001        | 0.5159       | 0.9729     |
| Mono PDL1                                             | 0.6166 ± 0.08614     | 4.838 ± 26.21      | 0.1803 ± 2.103       | < 0.0001        | 0.8542       | 0.9320     |
| CD45 <sup>+</sup> PDL1                                | 0.4836 ± 0.05650     | 7.593 ± 11.20      | 0.3806 ± 0.8961      | < 0.0001        | 0.5003       | 0.6725     |
| EpCAM PDL1                                            | 0.06115 ± 0.04264    | -10.63 ± 14.34     | 1.630 ± 1.066        | 0.1588          | 0.4627       | 0.1334     |



**Supplementary Table 7: Immune cell populations with significant differences by clinical stage (Two-Way ANOVA)**

|            | <b>Cell population</b> | <b>stage</b> | <b>NSCLC</b> | <b>ADCA</b> |
|------------|------------------------|--------------|--------------|-------------|
| <b>MFI</b> | CD4+ PD1               | 1a vs. 3/4   | <0.0001      | <0.0001     |
| <b>MFI</b> | total PD-L1            | 1a vs. 3/4   | <0.0001      | <0.0001     |
| <b>MFI</b> | Mono PD-L1             | 1a vs. 3/4   | <0.0001      | 0.0006      |
| <b>MFI</b> | CD8+ PD1               | 1a vs. 3/4   | ns           | 0.0013      |
| <b>MFI</b> | Mac PD-L1              | 1a vs. 3/4   | ns           | 0.0056      |

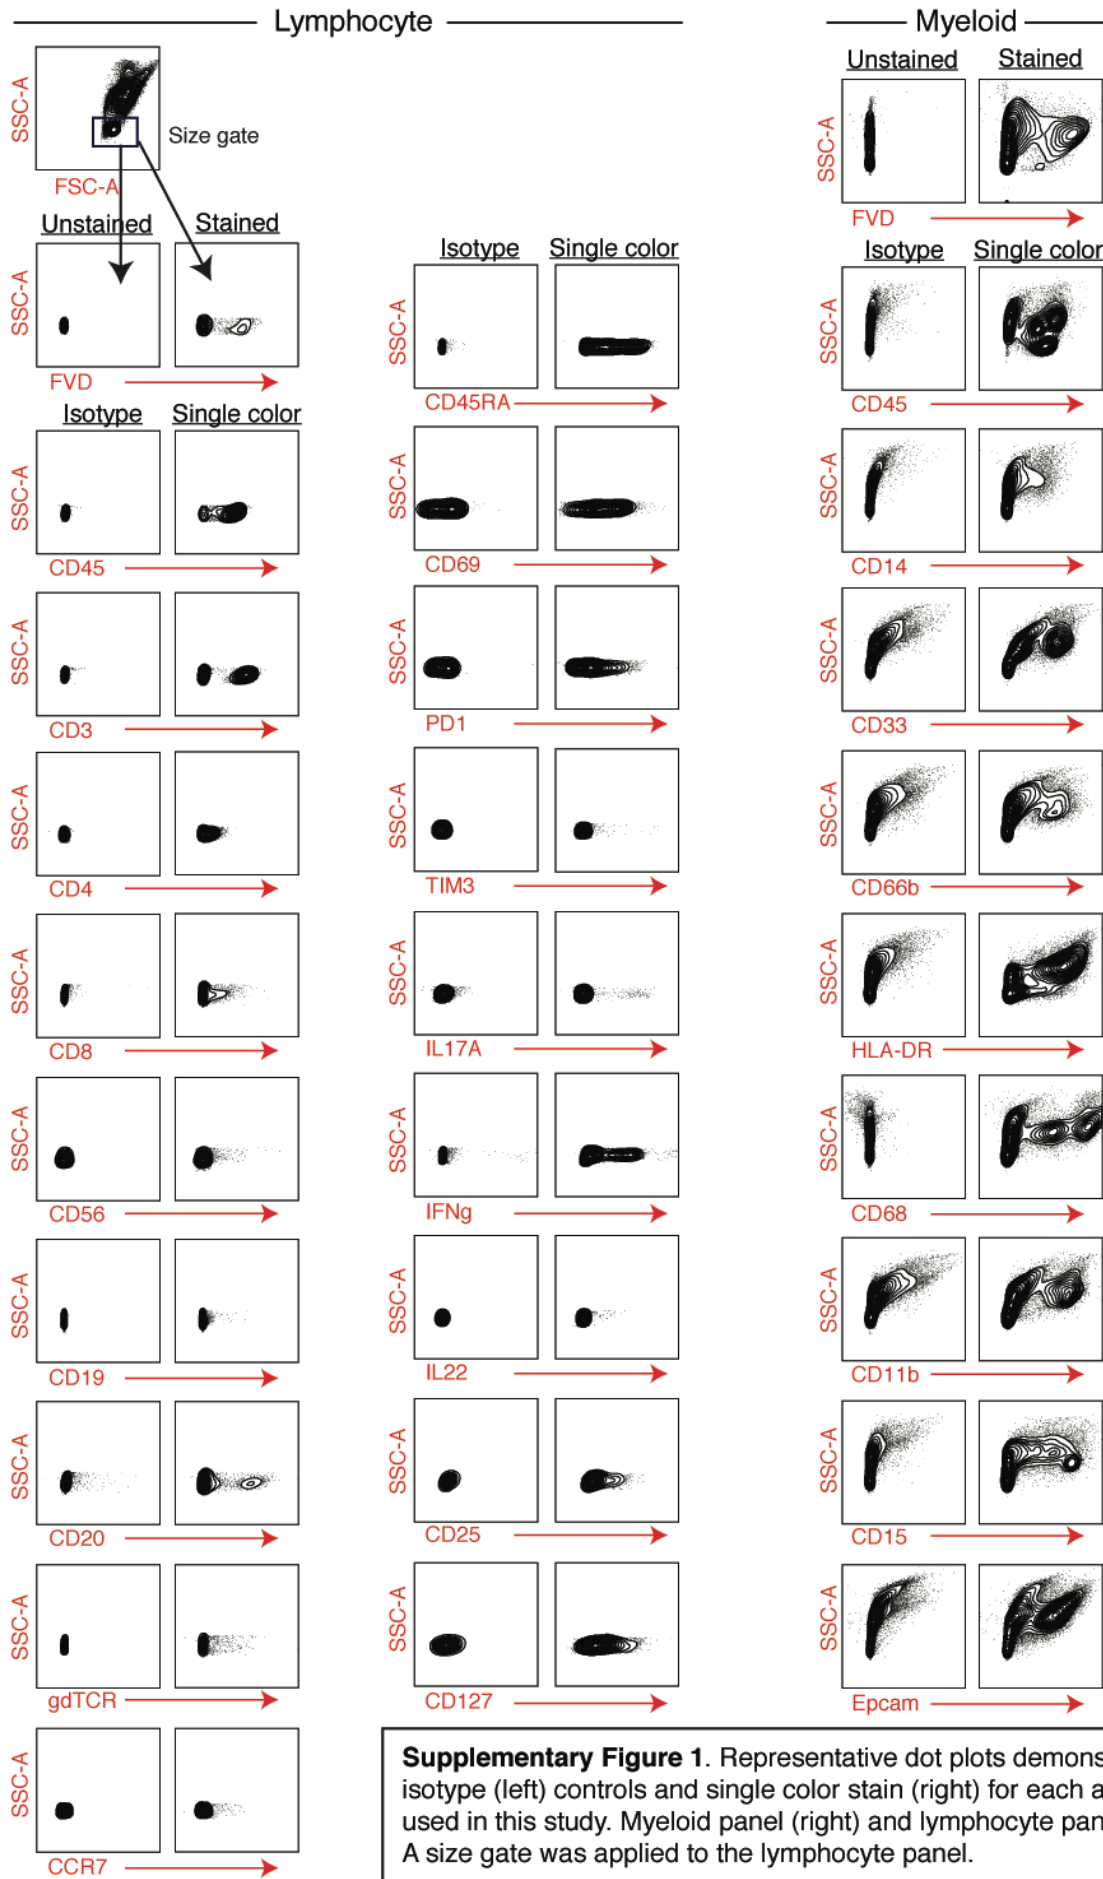

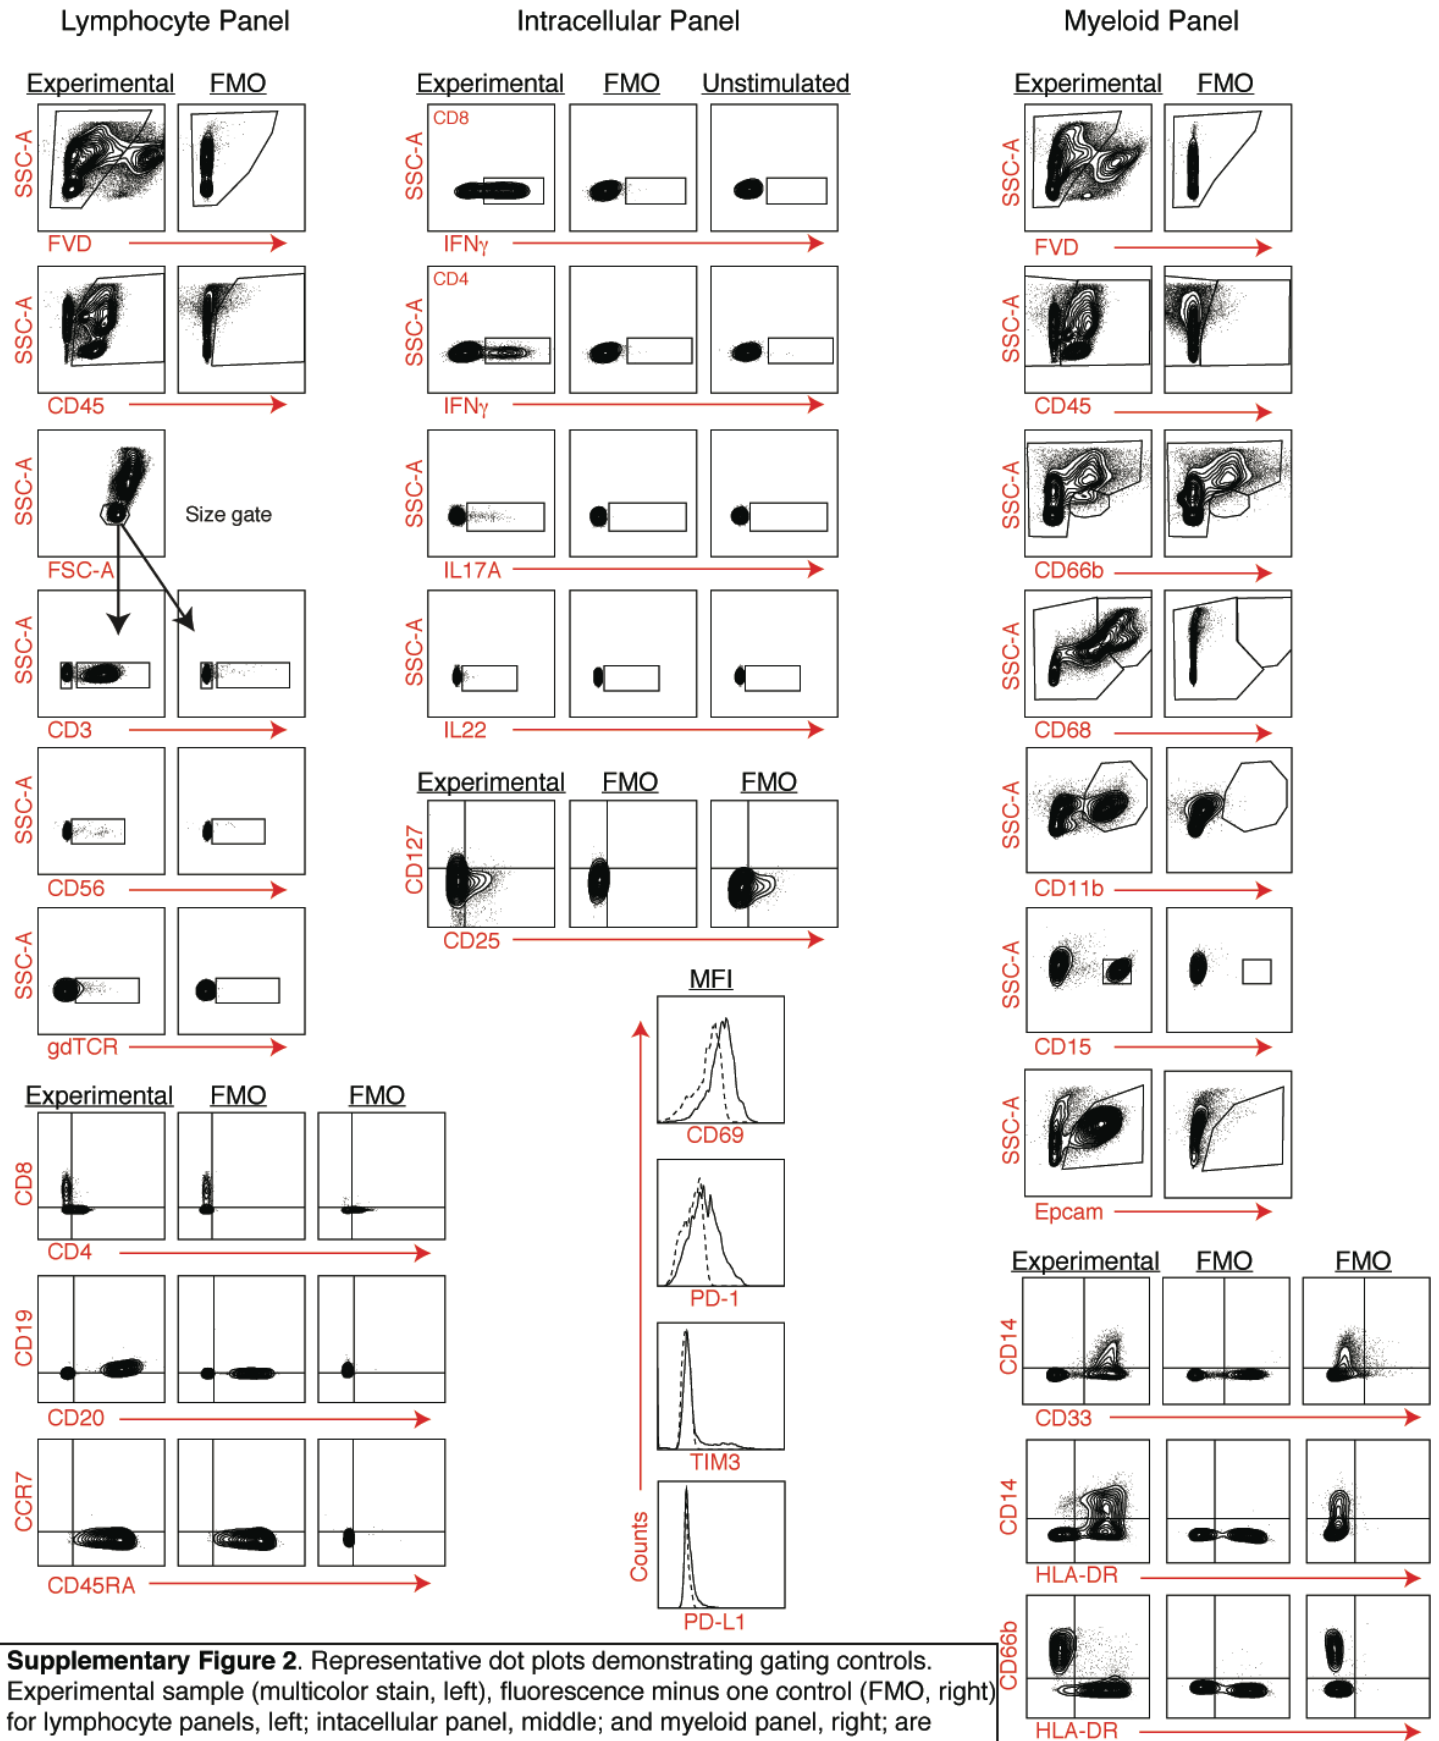

**Supplementary Figure 2.** Representative dot plots demonstrating gating controls. Experimental sample (multicolor stain, left), fluorescence minus one control (FMO, right) for lymphocyte panels, left; intracellular panel, middle; and myeloid panel, right; are displayed. The unstimulated control (only intracellular panel) was used for gating of cytokines (IL17, IFN $\gamma$ , IL22). Median fluorescence intensity (MFI) was used for functional markers (CD69, PD1, TIM3, PDL1; FMO=dotted line, multicolor stain=black line; middle panel, bottom).

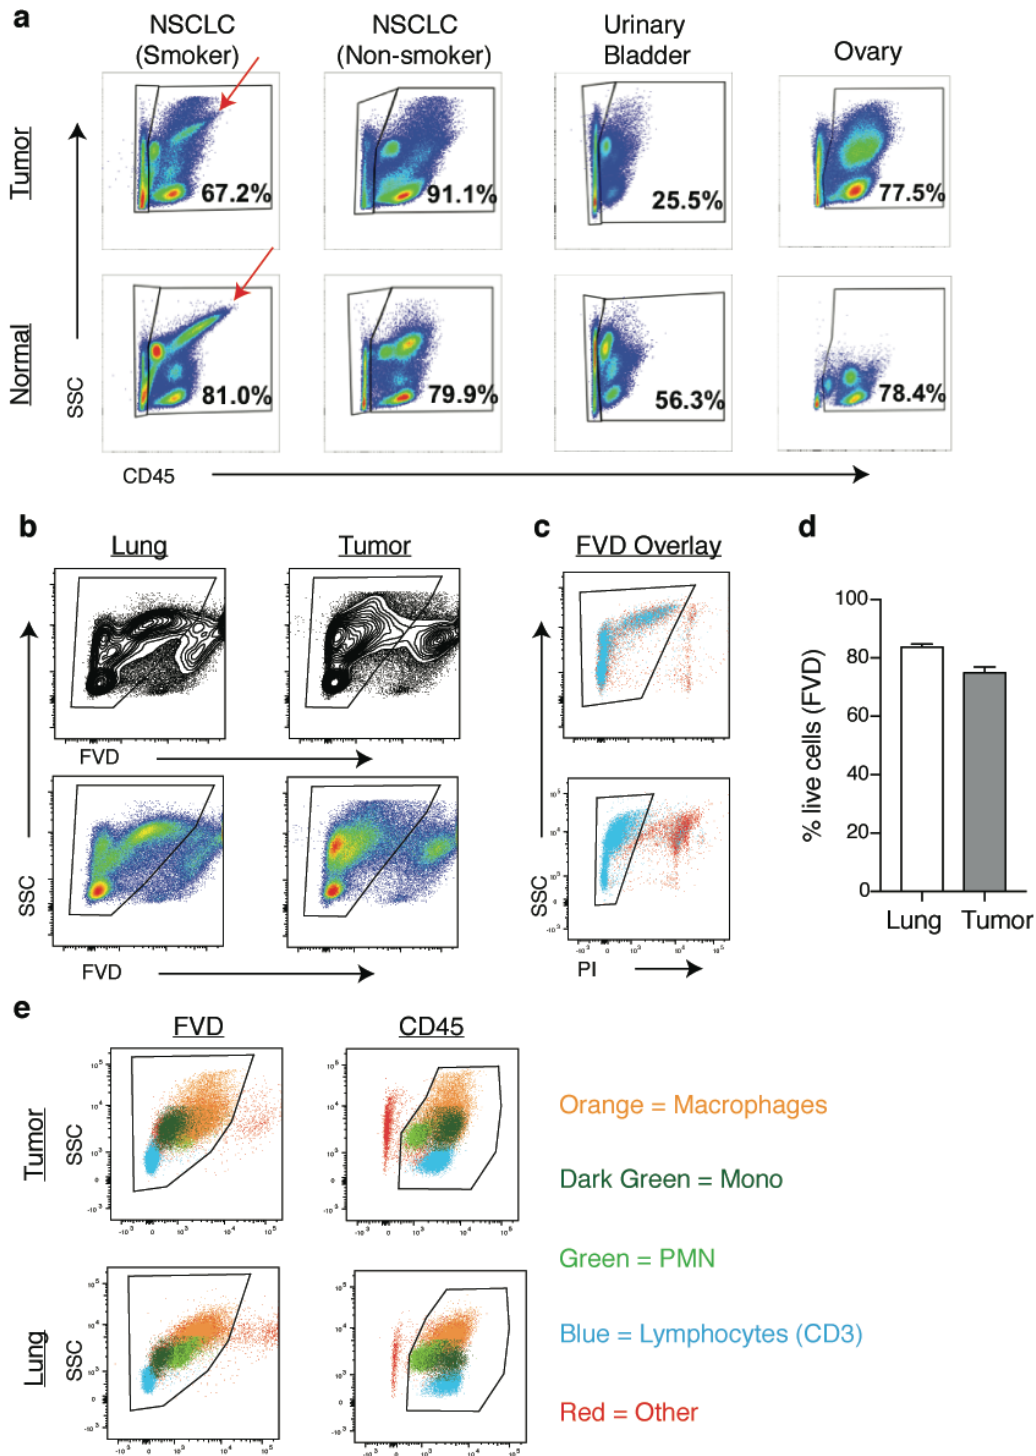

**Supplementary Figure 3.** a) CD45<sup>+</sup> staining of tumor and matched normal tissue for representative cases from NSCLC (smoker), NSCLC (non-smoker), urinary bladder cancer, and ovarian carcinoma. Despite identical staining protocols, the percentage of cells staining for CD45 varies by case and tissue. Red arrow depicts auto-fluorescent macrophages present in tumor and normal tissue from NSCLC smoker cases but not seen in other cases. b) Representative dot plots for lung and tumor displaying fixable viability dye (FVD) staining as contour (top) and pseudocolor (bottom). Contour plots were used for gating on live cells (FVD negative). c) FVD and propidium iodide (PI) co-staining were initially performed on lung and tumor single cell suspensions to examine different methods to discriminate live from dead cells (N=6). FVD and PI define similar live cell populations. FVD negative gated cells (blue) overlay on PI staining (red). FVD was used throughout the study to discriminate live from dead cells. d) Tabulation of live cells (FVD negative) for lung and tumor specimens (N=73), P=NS. e) Major cell populations were backgated on FVD gate (left panels) and CD45 gate (right panels) to confirm live/dead gating (two representative lung and tumor specimens).

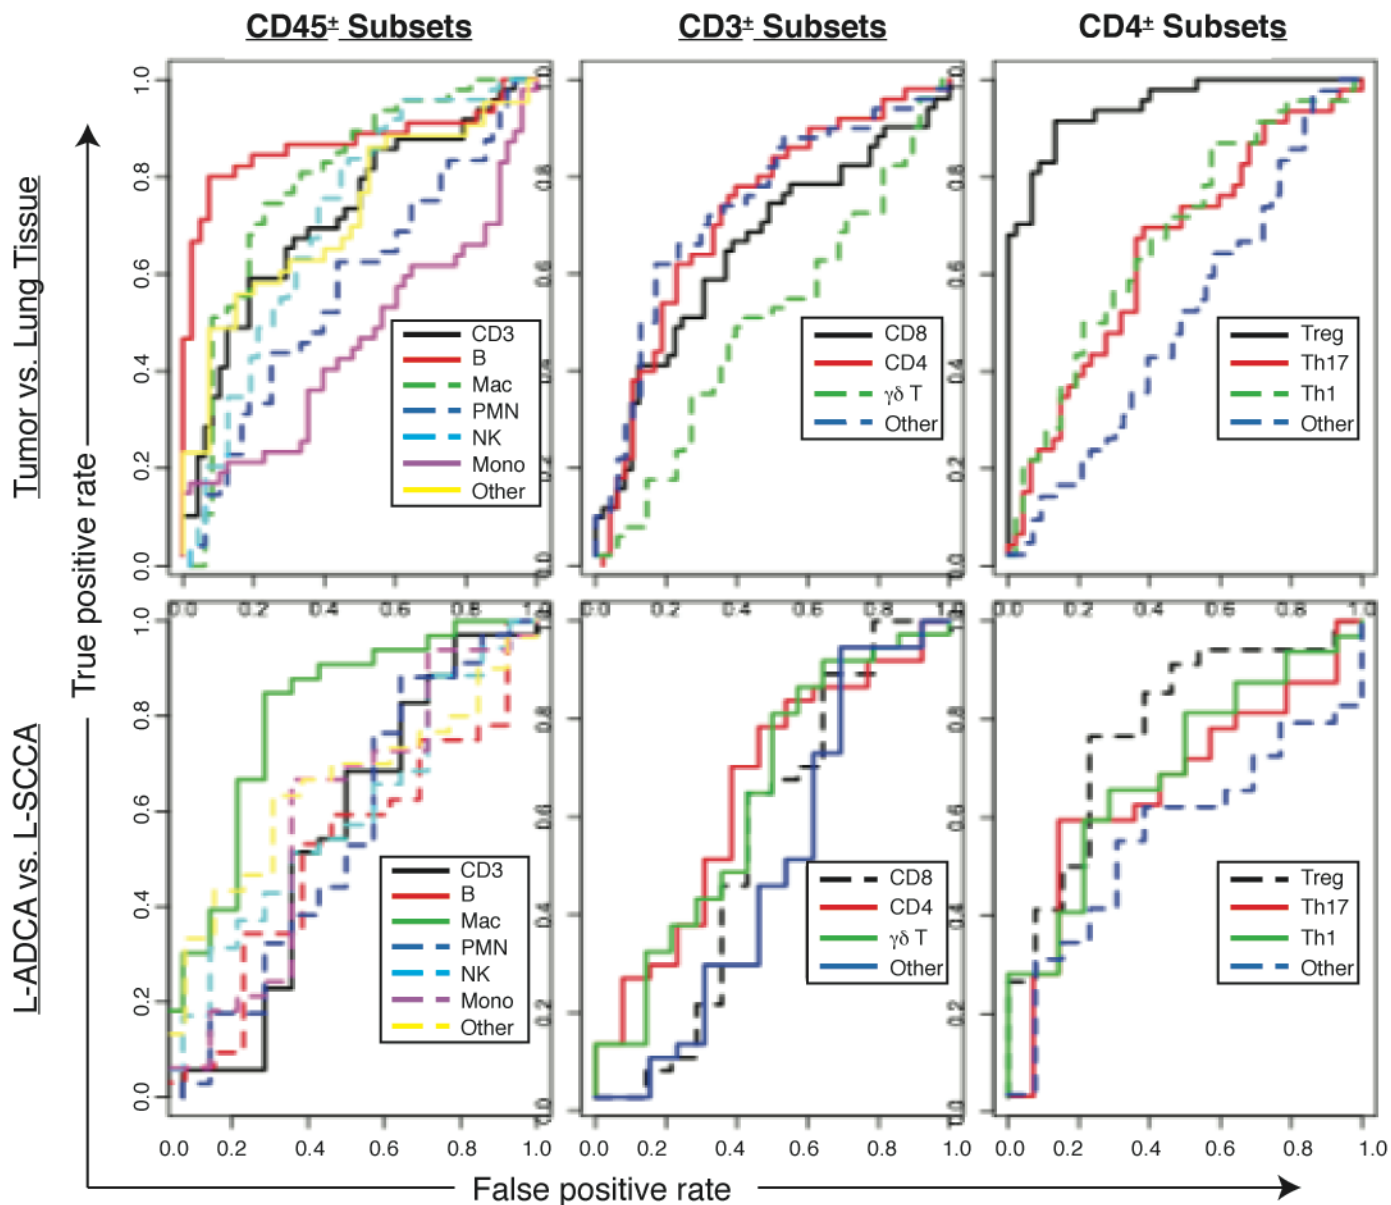

**Supplementary Figure 4.** Receiver Operating Characteristic (ROC) Curves showing discrimination ability of cell subset markers to differentiate tumor from normal lung tissue (top) and L-ADCA from L-SCCA (bottom). Solid lines indicate cell types that are more extreme in tumor vs. lung tissue (or L-ADCA vs. L-SCCA), and dotted lines indicate cell types that are more extreme in lung tissue vs. tumor (or L-SCCA vs. L-ADCA). The cell type marked “other” represents the difference between the total cell composition of the subset and 100% (i.e. the fraction otherwise not accounted for).

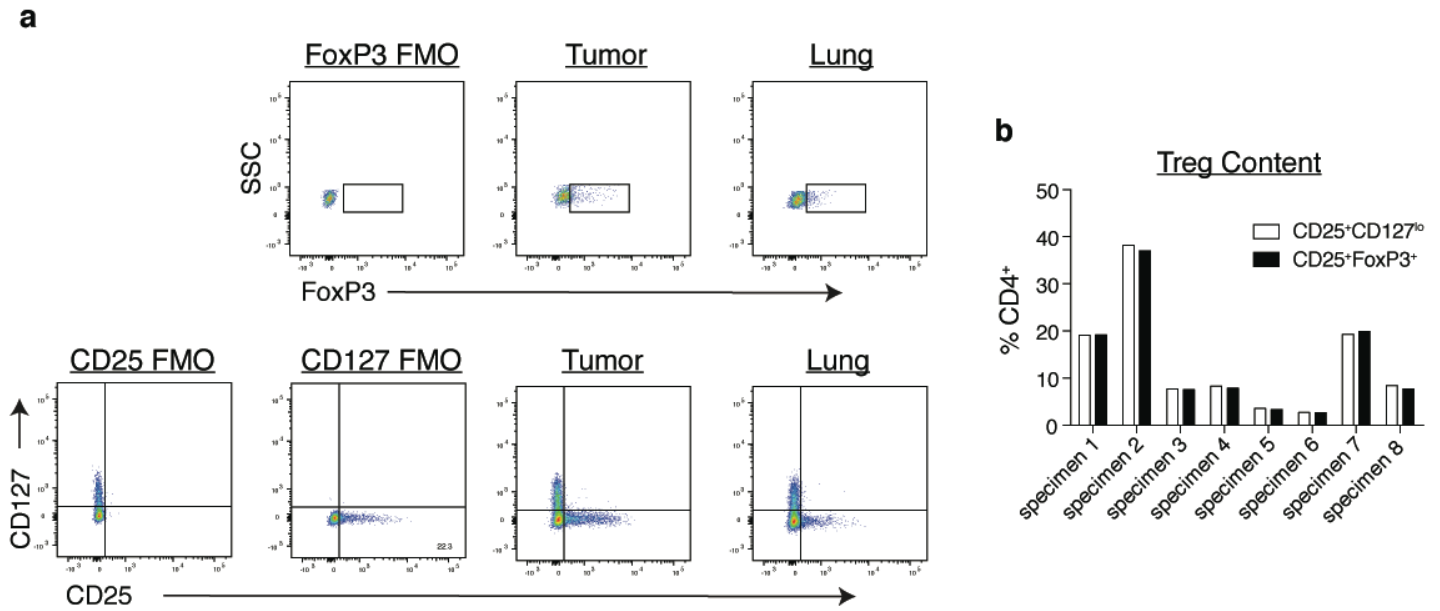

**Supplementary Figure 5.** The CD4<sup>+</sup>CD25<sup>+</sup>FoxP3<sup>+</sup> and CD4<sup>+</sup>CD25<sup>+</sup>CD127<sup>lo</sup> definitions of Tregs were compared on a set of N=8 NSCLC specimens. a) Representative gating of FoxP3 (top) and CD25/CD127 (bottom) depicting FMO controls (left) and tumor and lung (right). b) Tabulation of Tregs shows that both methods identified a similar number of cells as Tregs. The CD25<sup>+</sup>CD127<sup>lo</sup> methods was used during the remainder of the study to quantify Tregs.

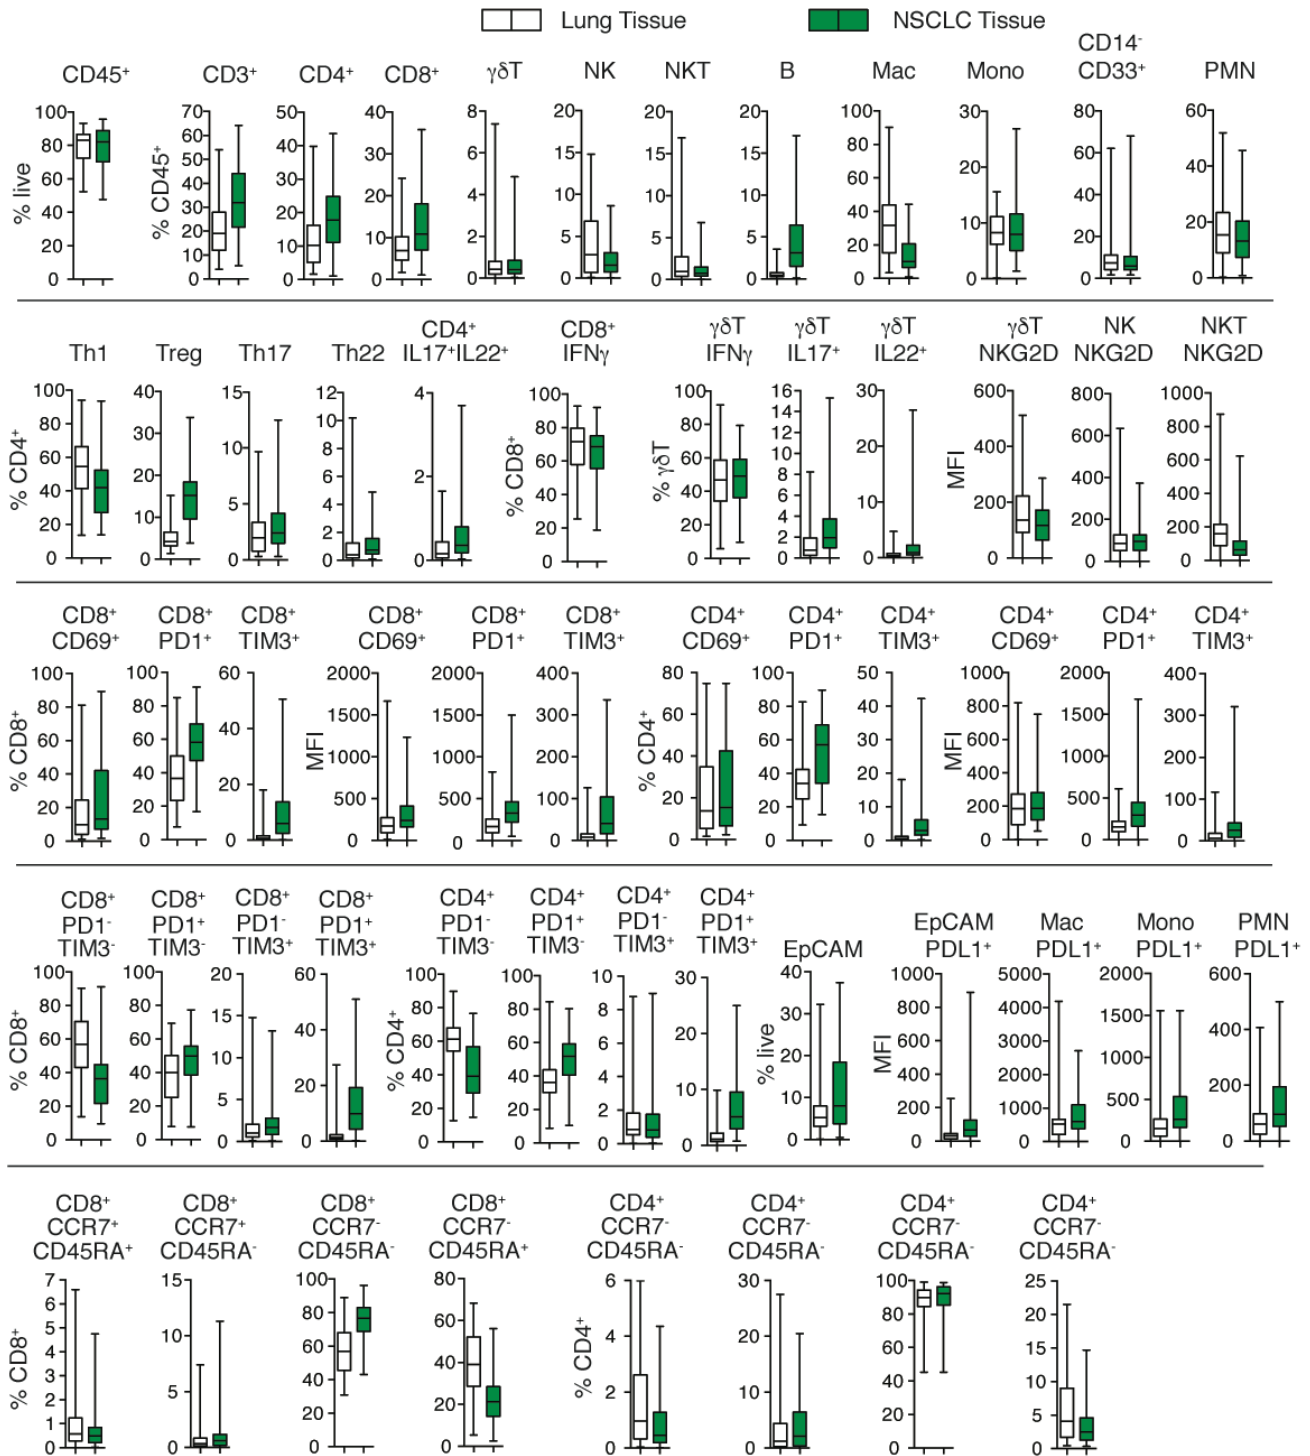

**Supplementary Figure 6.** Comparison of immune cell composition in lung tissue (white) and NSCLC tissue (green) for all cell populations analyzed. Data are presented as % live, %CD45<sup>+</sup>, % parent, or median fluorescence intensity (MFI), as indicated. Statistical analysis for each comparison is provided in Supplementary Table 3.



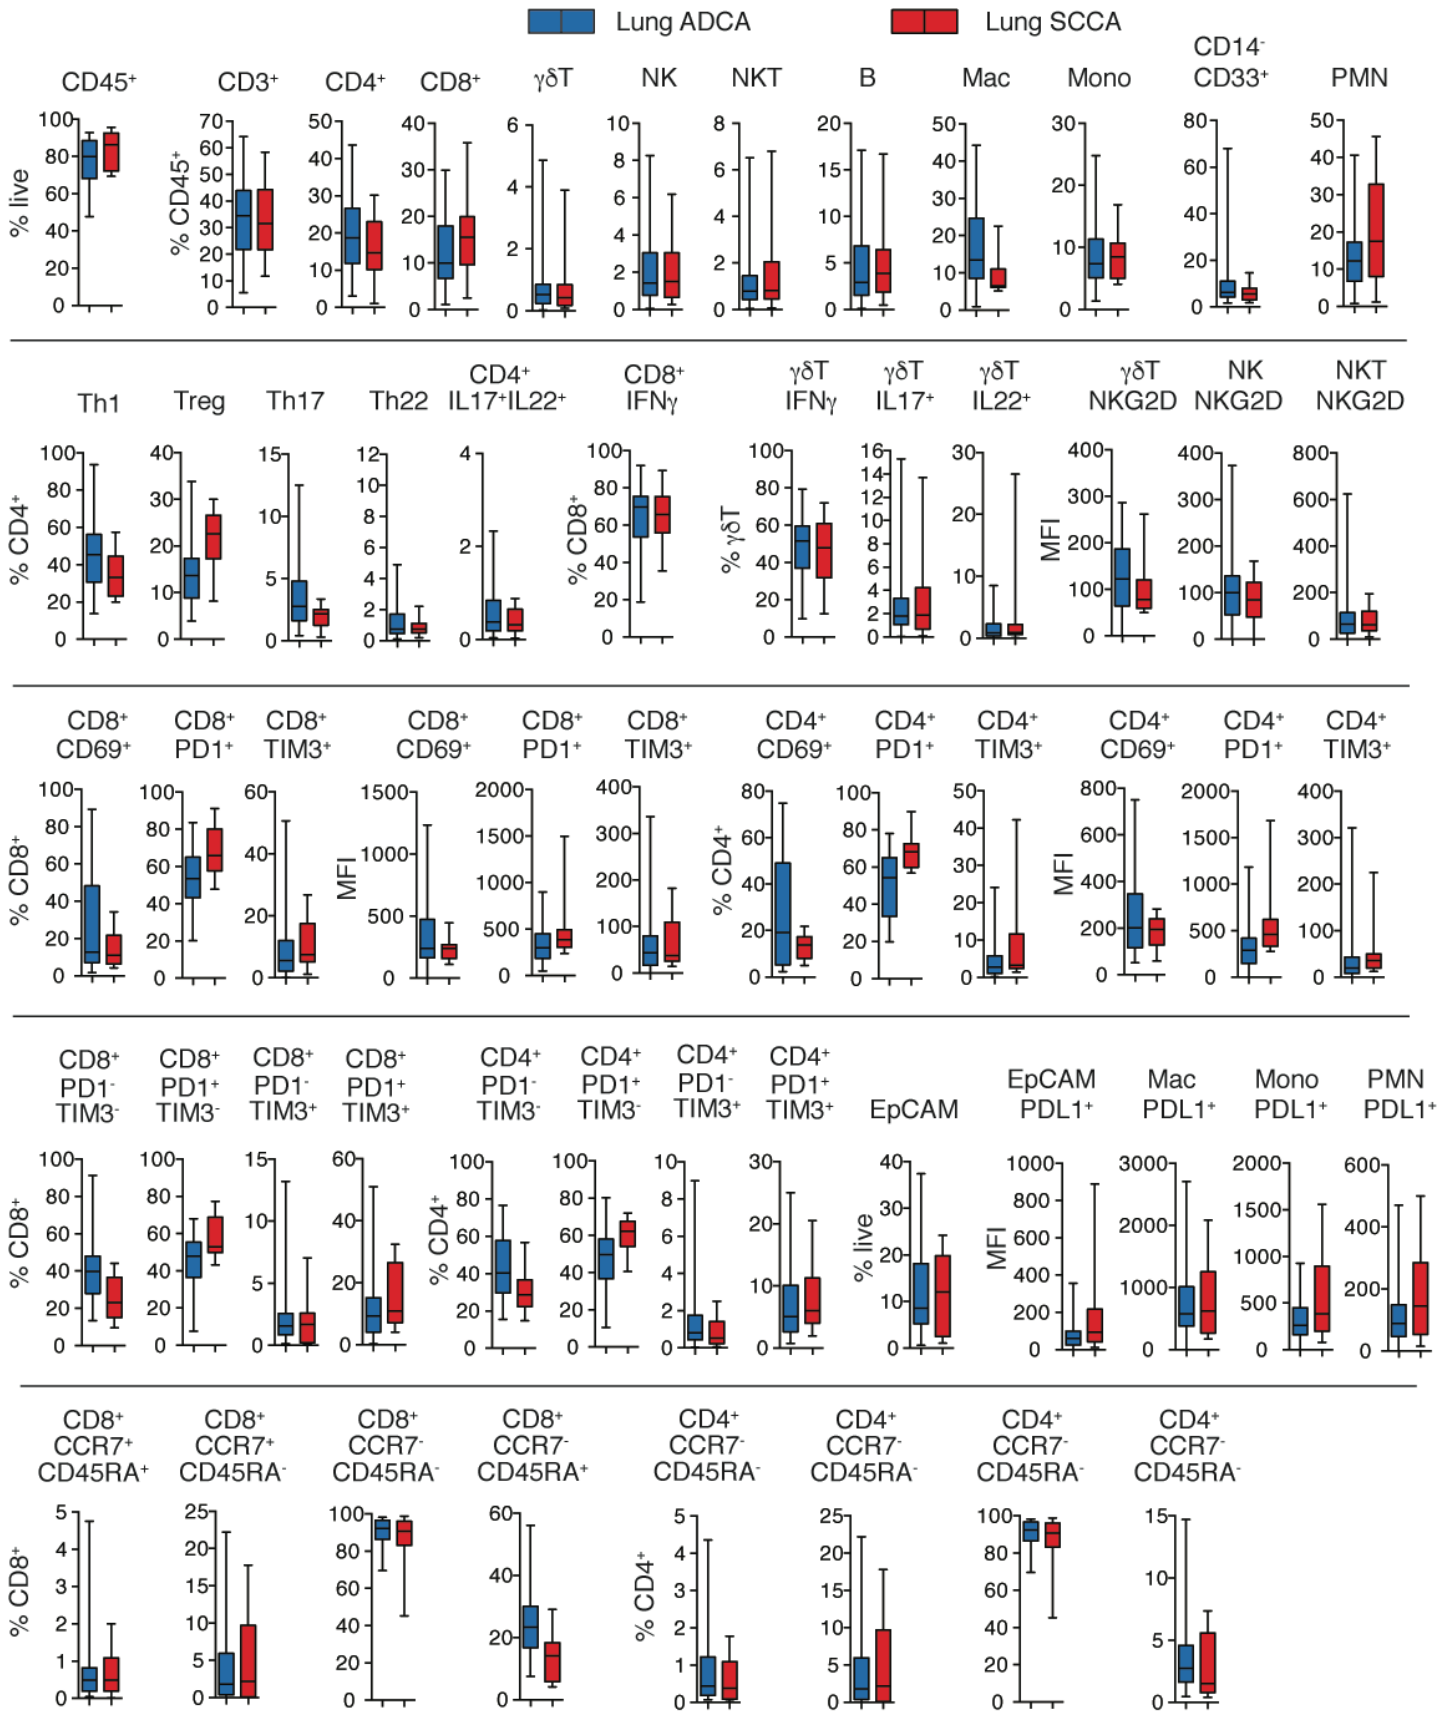

**Supplementary Figure 7.** Comparison of immune cell composition in L-ADCA (blue) and L-SCCA (red) specimens for all cell populations analyzed. Data are presented as % live, % CD45+, % parent or median fluorescence intensity (MFI), as indicated. Statistical analysis for each comparison is provided in Supplementary Table 3.



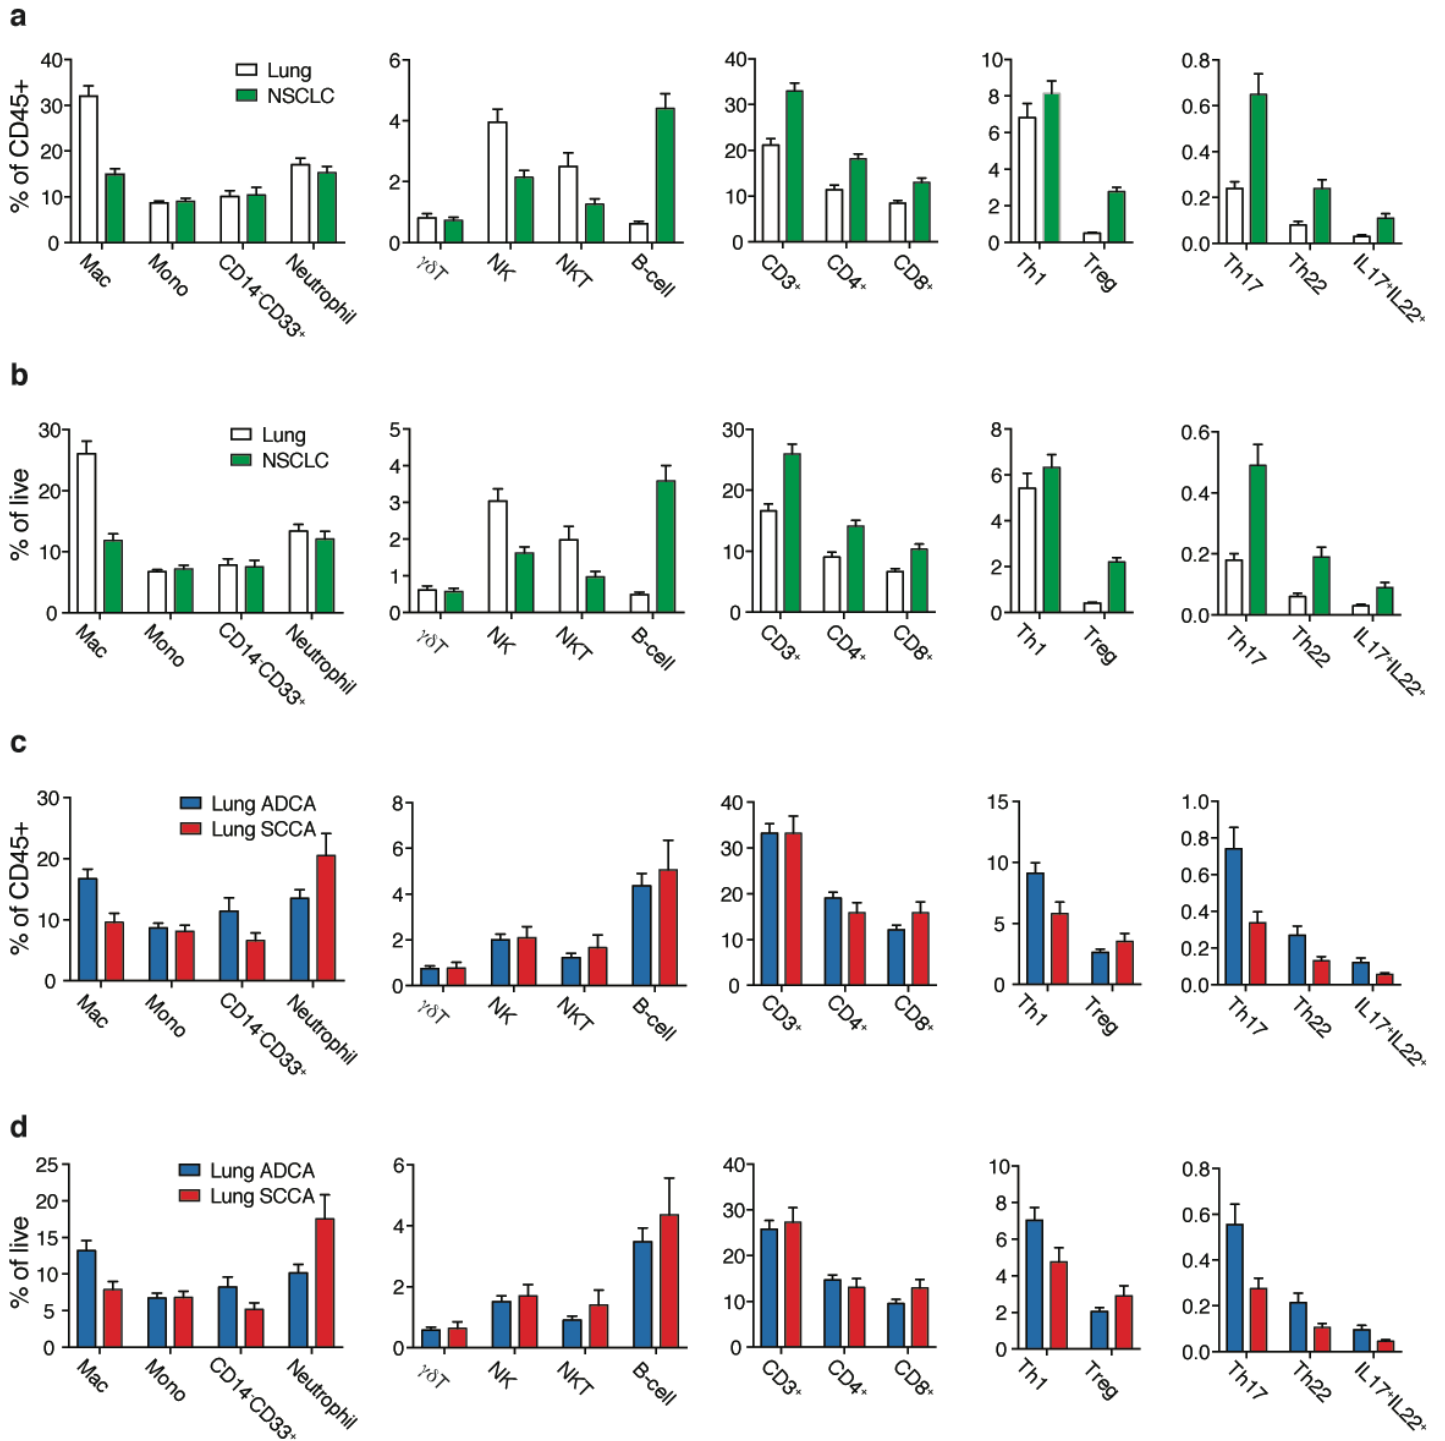

**Supplementary Figure 8.** Tabulation of immune cell content in non-adjacent lung tissue (white bars), NSCLC tissue (green bars), L-ADCA (blue bars) and L-SCCA (red bars) as measured by flow cytometry. Data are expressed as % of CD45+ cells (a and c) and as % of live cells (b and d).

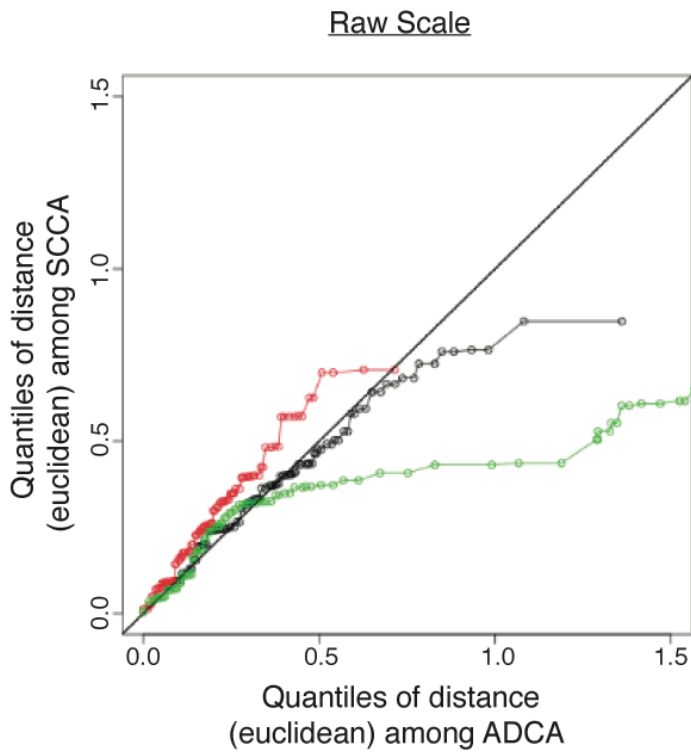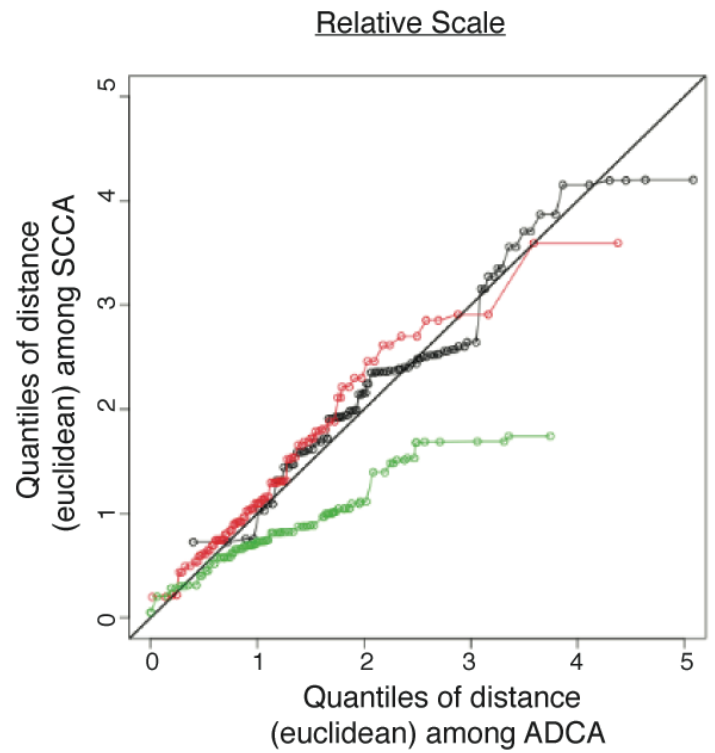

**Supplementary Figure 9.** Quantile plots comparing euclidean distance within the appropriate geometry for compositional data (see compositions package in R) of patient samples between ADCA (horizontal axis) and SCCA (vertical axis) for CD45<sup>+</sup> subsets (black), CD3<sup>+</sup> subsets (red), and CD4<sup>+</sup> subsets (green). The strong deviation of CD4<sup>+</sup> subsets away from the line indicate its higher levels of heterogeneity compared to SCCA. On the raw scale, the increased heterogeneity appears to be driven by a small fraction of the cases. On the relative scale, the deviation can be seen to occur throughout the entire distribution.

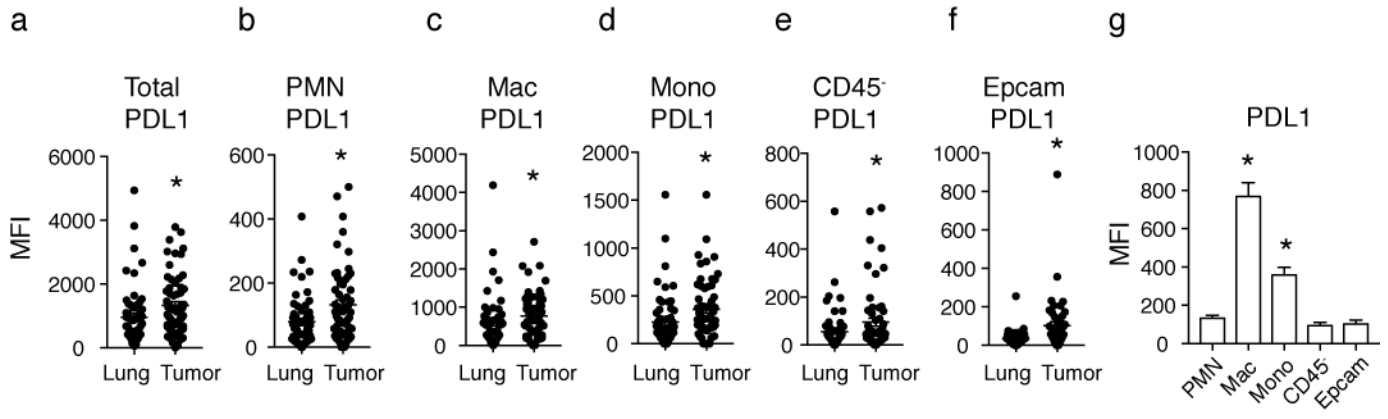

**Supplementary Figure 10.** PDL1 expression (MFI) from lung tissue and lung tumor for a) all cells, b) neutrophils, c) macrophages, d) monocytes) CD45<sup>-</sup> cells, and f)Epcam<sup>+</sup> cells as measured by flow cytometry. g) Tabulation of PDL1 expression by cell type. Bars +/- SEM. \*P<0.05 (student's t-test).

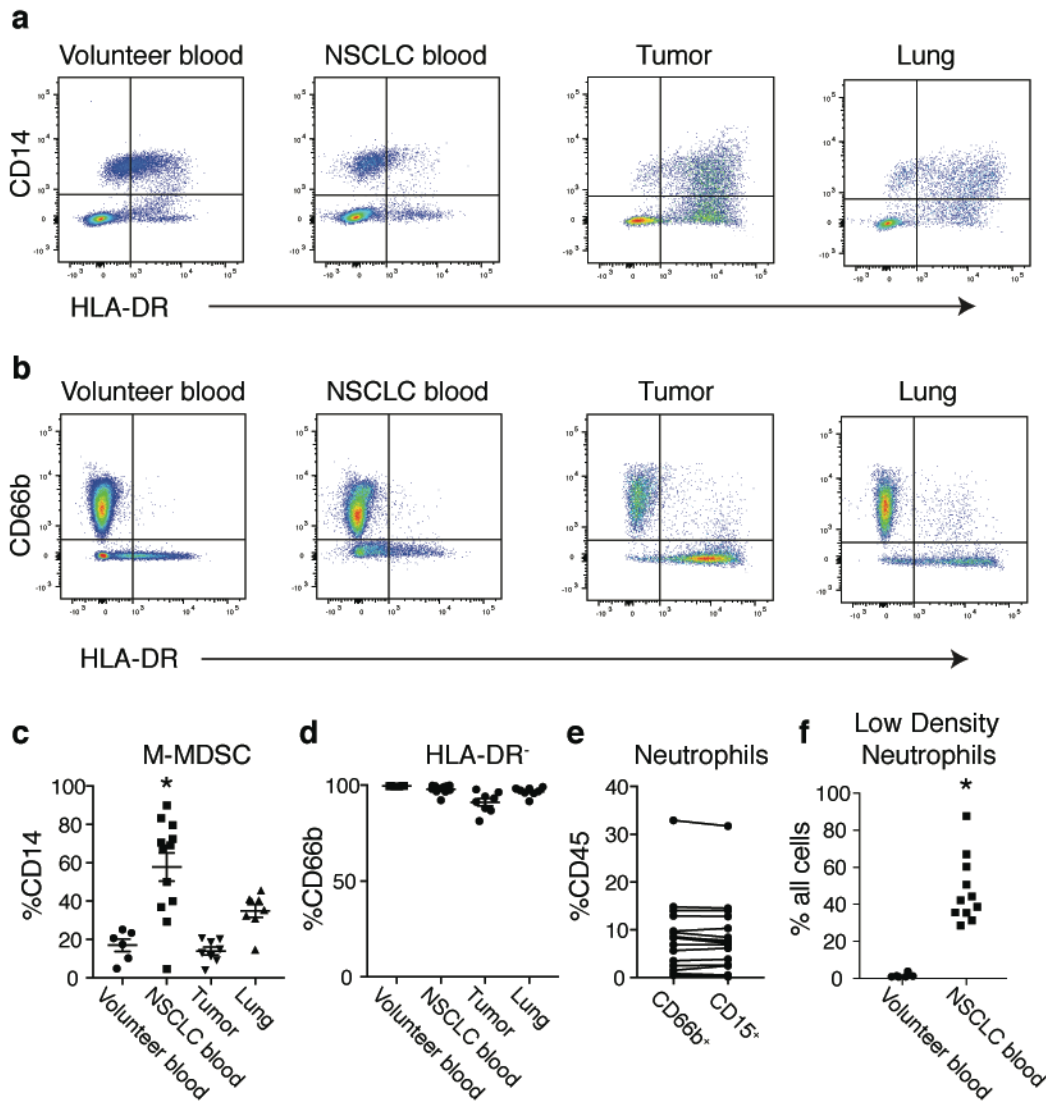

**Supplementary Figure 11.** Representative dot plots for myeloid derived suppressor cell (MDSC) gating. a) M-MDSC (CD11b<sup>+</sup>CD14<sup>+</sup>HLA-DR<sup>lo</sup>) and b) the neutrophil lineage (CD66b<sup>+</sup>/HLA-DR<sup>-</sup>) from healthy volunteer donor blood (far left), NSCLC patient blood (left), tumor tissue (right) and lung tissue (far right). Tabulation of c) M-MDSC and d) CD66b<sup>+</sup>HLA-DR<sup>-</sup> cells. e) CD66b and CD15 identify an equivalent number of cells as neutrophils (N=16). f) Tabulation of neutrophils located in the low density fraction following sucrose density gradient centrifugation for blood from healthy donor volunteers (N=6) and NSCLC patients (N=8). \*P<0.05.

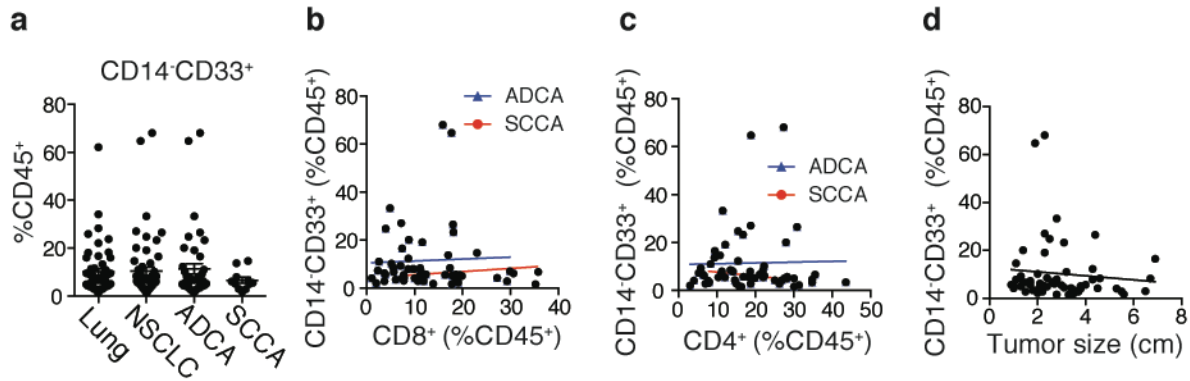

**Supplementary Figure 12.** a) Tabulation of CD14-CD33<sup>+</sup> cells in lung tissue and tumor tissue. Linear correlation of CD14-CD33<sup>+</sup> cells and b) CD8<sup>+</sup> cells, c) CD4<sup>+</sup> cells, and d) tumor tissue. P=NS for each regression.
